# Supplementary material for: Construction of porphyrin–cyclodextrin self-assembly with molecular wedge
Source: Royal Society of Chemistry journal article supplement (doi:10.1039/b311079f), 2004-01-01
Supplement: b311079f.doc [file b311079f.doc]

**Supplementary Information**

**Construction of Porphyrin-Cyclodextrin Self-assembly with Molecular Wedge**

Ken Sasaki,*a* Hiroki Nakagawa,*a* Xiao Yong Zhang,*a* Shinichi Sakurai,*a*

Koji Kano,*b* and Yasuhisa Kuroda**a*

*aDepartment of Polymer Science and Engineering, Kyoto Institute of Technology, Matsugasaki, Sakyo-ku, Kyoto 606-8585, Japan, E-mail: ykuroda@ipc.kit.ac.jp.*

*bDepartment of Molecular Science and Technology, Faculty of Engineering, Doshisha University, Kyotanabe, Kyoto 610-0321, Japan, E-mail: kkano@ mail.doshisha.ac.jp.*

**1. Synthesis of Tetraphenylporphyrin Bearing Four TMCD Moieties.**

**Free base (2):** Tetrakis(*p*-chloroformylphenyl)porphyrin, which was prepared by the reaction of 38.2mg (43.8mol) of　the corresponding carboxylic acid with thionyl chloride (1ml), was treated with a solution of 6A-amino-per-*O*-methyl--CD 343 mg (242mol) and triethyl amine (0.5ml) in dry methylene chloride (1ml). After stirring for 1 hour at room temperature under nitrogen, the solvent was evaporated under reduced pressure. The residue was dissolved in chloroform, washed with water, and dried over Na2SO4. The solvent was evaporated under reduced pressure, and purification of the crude solid by silica-gel chromatography eluted with CHCl3-MeOH (100:0-92:8), gave 60mg (9.4mol, 20%) of purple solid. 1HNMR (500MHz,CDCl3)  8.84 (s, 8H, pyrrole), 8.34 (d, *J* = 8.16 Hz, 8H, phenyl), 8.25 (d, *J* = 8.16 Hz, 8H, phenyl), 7.26 (t, 4H, amide), 5.46-5.10 (m, 28H, C1-H of CD), 4.32-3.22 (m, 408H, other CD-H), -2.75 (s, 2H, inner N-H). MS (FAB) *m/z* 6376.98 [M+].UV-Vis (CHES buffer, pH 9)  (log ) 416.5nm (5.65), 510.5nm (4.33), 543.5nm (3.86), 585.5nm (3.79), 642nm (3.41).

**Zinc complex (Zn2):** A mixture of 43mg (6.7 mol) of free base **2** and 30.4mg (153 mol) of zinc acetate in methanol (1.5ml) was refluxed for one hour. The solvent was evaporated under reduced pressure, and the residue was dissolved in chloroform and washed with water. The organic layer was dried over Na2SO4, and evaporated under reduced pressure. Purification of the crude solid by preparative HPLC (ODS eluted with methanol), and gave 25 mg (3.9mol) of pure zinc complex.  1HNMR (500MHz, CDCl3)  8.92 (s, 8H, pyrrole), 8.32 (d, *J* = 8.16 Hz, 8H, phenyl), 8.22 (d, *J* = 8.16 Hz, 8H, phenyl), 7.26 (t, 4H, amide), 5.48-5.10 (m, 28H, C1-H of CD), 4.35-3.22 (m, 408H, other CD-H). MS (FAB) *m/z* 6440.6 [M+]. UV-Vis (CHES buffer, pH 9)  (log ) 424.5nm (5.75), 555nm (4.31), 594nm (3.66).

2. Mathematical treatment of spectra.

The equation 1 is easily derived assuming 1:1 complex formation between **1** and **2**.

Abs() = Abs()obs-**1**()[**1**]Total-**2**()[**2**]Total = ()[**1**•**2**] eq.1

where Abs() is absorbance at wavelength , **1**or**2**() is the corresponding molar absorption coefficient. The parameter () means **1•2**() -**1**()-**2**(). In the calculation, each subtracted spectrum, 1()[**1**]Total and 2()[**2**]Total, was evaluated by using sole spectrum of **1** and **2**.

**3. Estimation of donor-acceptor distance based on Förster mechanism.**

The donor-acceptor distance (R) is estimated from the energy transfer rate (**k*e****t*) from donor porphyrin to acceptor one. The **k*et*** is expressed by the following equation (Förster equation).

(8.8 x 10-25) f **JF**

**k*et*** = ————————————

n4sR6

: an orientation factor.

f: fluorescence quantum yield of the donor porphyrin.

n: refractive index of solvent,

s: fluorescence life time of donor

R: center to center distance between the donor and the acceptor

**JF**: overlap integral obtained from fluorescence intensity at wave number (*v*) (F(**)) of the donor and the molar extinction coefficient ((**)) of absorption band of the acceptor in following formation,

**JF** = *∫* F(**)(**)** -4d** /*∫*F(**)d**

The **JF** value was measured as the area of the right term function of this equation, which is constructed from the observed fluorescence and UV/Vis spectra.

The energy transfer efficiency (et) is expressed by **k (= 1/s)** and **k*et***,

et = **k*et* / (k*et* + k)**

The inverse of et is,

1/et = 1 + **k/k*et*** = 1 + 1/**(k*et*** xs**)**

From Förster equation,

R6 = 1/(sx **k*et***) x (8.8 x 10-25) f **JF** /n4 = (1/et - 1) x (8.8 x 10-25) f **JF** /n4

**4. Job's plot.**

**Figure S1.** Job's plot upon mixing **1** and **2** monitored at 506nm (square) and 524nm (triangle) (concentration of [**1**] + [**2**] = 5.76 x 10-6 M). **Abs was determined by spectral calculation as shown in eq. 1 in text.

**5. GPC analysis.**

**Figure S2.** GPC analysis of [**1•2**] (9.62 ml) and [**1•3**] (10.36 ml) assemblies by Tohso G-4000PWXL (250 mm) at 20 oC. Circle and triangle indicate calculated molecular weight of [**12•22**] and [**12•32**], respectively. Molecular weight standards (proteins) were indicated as square.

**6. Molecular size determination by Small Angle X-ray Scattering (SAXS).**

Scattering intensity I(q) in small angle region (q2<0.5) of X-ray scattering is expressed as a function of scattering vector, qand gyration radius of particle, Rg.

I(q) = I(0)*exp*(-Rg2q2/3)

*ln* I(q) = constant + (-Rg2/3)q2

Here, q=4(1/)sin(**/2),**: scattering angle, :wavelength of X-ray (= 0.1nm).

According to these equations, Rg of **Zn1•2** (1:1) assembly was determined as 1.45nm from the slope (-0.703) of plot of ln I(q) vs. q2 (Guinier plot).

If the assembly has the short cylindrical shape as shown in Figure 2 in text, Rg is evaluated from the radius, R, and the half-height, H.

Rg = (R2/2+H2/3)1/2

When 1.9nm and 1.0nm are adopted for R and H values, respectively, Rg is estimated as 1.46nm, which is identical with experimental value (1.45nm).

**Figure S3.** Guinier plot of small angle X-ray scattering (SAXS) intensity of [**Zn1•2**] (1:1) assembly (1 wt% in water).

**7. ESI-Mass Spectrum**

**Figure S4.** ESI-Mass spectrum (negative ion mode) of [**Zn1•3**] (1:1) assembly in 45% methanol/H2O.
